# Supplementary material
Source: publisher figshare collection journal article supplement (https://gsapubs.figshare.com/ndownloader/files/23316314)
Supplement: Supplementary file 1 [file 23316314]

## Sheet: TIMS_Vienna
Sinnesael, M., Montanari, A., Frontalini, F., Coccioni, R., Gattacceca, J., Snoeck, C., Wegner, W., Koeberl, C., Morgan, L.E., de Winter, N.J., DePaolo, D.J., and Claeys, P., 2019, Multiproxy Cretaceous-Paleogene boundary event stratigraphy: An Umbria-Marche basinwide perspective, in Koeberl, C., and Bice, D.M., eds., 250 Million Years of Earth History in Central Italy: Celebrating 25 Years of th…
GSA Data Repository Item 2019216
Table DR3: Strontium isotopes
Samples	position		87Sr/86Sr	+/-2sm
MRL-91.0	91	WR	0.7079	3.8725e-06	6NHCl
MRL-91.5	91.5	WR	0.707909	3.206e-06	6NHCl
MRL-92.0	92	WR	0.707897	4.09e-06	6NHCl
MRL-92.5	92.5	WR	0.707904	3.558e-06	6NHCl
MRL-93.0	93	WR	0.707996	3.81e-06	6NHCl
MRL-93.5	93.5	WR	0.707951	3.372e-06	6NHCl
MRL16-94.4	94.4	WR	0.707897	3.62e-06	6NHCl
MRL16-94.9	94.9	WR	0.707932	3.22e-06	6NHCl
MRL16-95.4	95.4	WR	0.707913	3.98e-06	6NHCl
MRL16-95.9	95.9	WR	0.707906	3.48e-06	6NHCl
MRL16-96.4	96.4	WR	0.707888	4.2e-06	6NHCl
MRL16-96.9	96.9	WR	0.707904	4e-06	6NHCl
MRL16-97.4	97.4	WR	0.707906	3.64e-06	6NHCl
MRL16-97.9	97.9	WR	0.707914	4.6e-06	6NHCl
MRL16-97.9	97.9	WR	0.707864	4.22e-06	0,1N CH3COOH
MRL16-98.4	98.4	WR	0.707918	3.2e-06	6NHCl
MRL16-98.9	98.9	WR	0.707941	3.76e-06	6NHCl
MRL16-99.4	99.4	WR	0.707985	3.2e-06	6NHCl
MRL16-99.9	99.9	WR	0.707916	3.84e-06	6NHCl
MRL16-99.9	99.9	WR	0.707857	3.09e-06	0,1N CH3COOH
MRL17-100.05	100.05	WR	0.70799	4e-06	6NHCl
MRL17 100.3	100.3	WR	0.707938	3.796e-06	6NHCl
MRL17-0.55	0.55	WR	0.70795	4.26e-06	6NHCl
MRL17-0.8	0.8	WR	0.708173	4e-06	6NHCl
MRL17-0.8	0.8	WR	0.707863	4e-06	0,1N CH3COOH
MRL17-1.05	1.05	WR	0.708067	3.71e-06	6NHCl
MRL17-1.05	1.05	WR	0.707857	3.71e-06	0,1N CH3COOH
MRL17-1.3	1.3	WR	0.70801	4e-06	6NHCl
MRL17-1.55	1.55	WR	0.707968	3.742e-06	6NHCl
MRL17-1.8	1.8	WR	0.707931	3.52e-06	6NHCl
MRL17-2.05	2.05	WR	0.707923	4.01e-06	6NHCl
MRL17-2.3	2.3	WR	0.70792	2.99e-06	6NHCl
MRL-2.5	2.5	WR	0.708071	3.88e-06	6NHCl
MRL-3.0	3	WR	0.707898	4e-06	6NHCl
MRL-3.5	3.5	WR	0.707962	3.88e-06	6NHCl
MRL-4.0	4	WR	0.7079	2.716e-06	6NHCl
NBS987	4e-05	two sigma
(n=15)

## Sheet: MC_ICP_MS_Brussels
m-level	87Sr/86Sr	section-sampling mission	Fraction				m-level	87Sr/86Sr	section-sampling mission	Fraction
0.5	0.707997	MRL16	bulk carbonate fraction				4	0.70778	COH16	bulk carbonate fraction
0.1	0.707872	MRL16	bulk carbonate fraction				3.8	0.707823	COH16	bulk carbonate fraction
-0.5	0.707913	MRL16	bulk carbonate fraction				3.6	0.707812	COH16	bulk carbonate fraction
-1	0.707874	MRL16	bulk carbonate fraction				3.4	0.707785	COH16	bulk carbonate fraction
-1.5	0.707852	MRL16	bulk carbonate fraction				3.2	0.707851	COH16	bulk carbonate fraction
-2	0.707847	MRL16	bulk carbonate fraction				3	0.707862	COH16	bulk carbonate fraction
-2.5	0.707854	MRL16	bulk carbonate fraction				2.8	0.707849	COH16	bulk carbonate fraction
-3	0.707846	MRL16	bulk carbonate fraction				2.6	0.707849	COH16	bulk carbonate fraction
-3.5	0.707797	MRL16	bulk carbonate fraction				2.4	0.707815	COH16	bulk carbonate fraction
-4	0.707815	MRL16	bulk carbonate fraction				2.2	0.707817	COH16	bulk carbonate fraction
-5	0.707797	MRL16	bulk carbonate fraction				2	0.707836	COH16	bulk carbonate fraction
-6	0.707803	MRL16	bulk carbonate fraction				1.8	0.707852	COH16	bulk carbonate fraction
							1.6	0.707883	COH16	bulk carbonate fraction
							1.4	0.707832	COH16	bulk carbonate fraction
							1.2	0.707858	COH16	bulk carbonate fraction
							1	0.707814	COH16	bulk carbonate fraction
							0.8	0.707886	COH16	bulk carbonate fraction
							0.6	0.707837	COH16	bulk carbonate fraction
							0.5	0.707899	COH16	bulk carbonate fraction
							0.4	0.707842	COH16	bulk carbonate fraction
							0.3	0.707858	COH16	bulk carbonate fraction
							0.2	0.707847	COH16	bulk carbonate fraction
							0.1	0.707839	COH16	bulk carbonate fraction
							0.025	0.707804	COH16	bulk carbonate fraction
							-0.5	0.707819	BOT13	bulk carbonate fraction
							-1	0.707827	BOT13	bulk carbonate fraction
							-1.55	0.707807	BOT13	bulk carbonate fraction
							-2	0.707836	BOT13	bulk carbonate fraction
							-2.45	0.7078	BOT13	bulk carbonate fraction
							-3	0.707842	BOT13	bulk carbonate fraction
							-3.5	0.707756	BOT13	bulk carbonate fraction
							-4	0.707871	BOT13	bulk carbonate fraction
							-4.5	0.707819	BOT13	bulk carbonate fraction
							-5	0.707847	BOT13	bulk carbonate fraction
							-5.5	0.707851	BOT13	bulk carbonate fraction
							-5.9	0.707829	BOT13	bulk carbonate fraction

## Sheet: TIMS_Berkeley
Bottacione											S	Foram zone	M. chron	Phase	m.y.	87Sr/86Sr	±2 SD	±2 SE	N=x
											Contessa Highway
Sgr. Ht.		Foram zone	M. chron	Phase	m.y.	87Sr/86Sr	±2SDmean	N=X			1	eugubina	29R	BC	65	0.707829	11	12	2
260.9	-86.73	elevata	33R	BC	74.7	0.70765	3	2			1	pseudobulloides	29R	BC	64.7	0.707818	11	12	2
263	-84.63	elevata	33R	BC	74.48	0.707658	3	2			2	pseudobulloides	?	FT	64.5	0.707825	7	12	2
265	-82.63	calcarata	33R	BC	74.33	0.707658	3	2			2	pseudobulloides	?	BC	64.45	0.707831	8	12	2
268	-79.63	calcarata	33R	BC	74.1	0.707679	1	2			3	pseudobulloides	?	BC	64.18	0.707817	5	12	2
269.9	-77.73	calcarata	33R	BC	73.95	0.707676	2	2			4	pseudobulloides	?	BC	64	0.707821	51	29	3
271	-76.63	tricarnata	33R	BC	73.85	0.707683	5	2			5	pseudobulloides	?	BC	63.77	0.707801	21	15	2
276	-71.63	tricarnata	33R	BC	73.49	0.707681	8	2			8	trinidadensis	27R	BC	63	0.707813	0	12	2
281	-66.63	tricarnata	33R	BC	73.1	0.707706	8	2			11	uncinata	27R	BC	62.2	0.707796	21	15	2
285	-62.63	tricarnata	33N	BC	72.8	0.707708	3	2			14	pusilla	27N/26R	BC	61.6	0.707803	14	12	2
290	-57.63	tricarnata	32R?	BC	72.3	0.707724	1	2			17	pseudomenardii	26R	BC	60.8	0.707819	4	10	3
296	-51.63	tricarnata	32R?	BC	71.45	0.707742	7	2			20	pseudomenardii	26R/26N	BC	60	0.707803	14	12	2
301	-46.63	tricarnata	32N	BC	71	0.707737	7	2			25	velascoensis	26R/25N	BC	58.8	0.707792	6	12	2
306	-41.63	gansseri	32N	BC	70.35	0.707748	15	3			30	edgari	25N	BC	57.5	0.707767	11	12	2
311	-36.63	gansseri	32N	BC	69.79	0.70776	7	3			34.6	?	24R	BC	56.43	0.707751	8	12	2
316	-31.63	gansseri	32N	BC	69.2	0.707765	4	3			40	?	24R	BC	55.2	0.707738	6	12	2
321	-26.63	gansseri	32N	BC	68.65	0.707778	16	2			Monte Conero, Fornaci Central Quarry
323	-24.63	gansseri	32N	BC	68.38	0.707785	23	2			128.5	mayaroensis	–	BC	66.34	0.707829	4	12	2
324	-23.63	gansseri	32N	BC	68.3	0.707797	4	2			131.9	mayaroensis	–	BC	66.04	0.707821	14	10	3
325.5	-22.13	gansseri	31N	BC	68.1	0.707804	2	2			134.8	mayaroensis	–	BC	65.75	0.70782	8	12	2
326	-21.63	contusa	31N	BC	68.05	0.707779	0	2			140.885	mayaroensis	–	BC	65.1	0.707842	14	12	2
327	-20.63	contusa	31N	BC	67.95	0.707787	14	2			140.975	mayaroensis	–	BC	65.06	0.707836	1	12	2
327	-20.63	contusa	31N	BC	67.95	0.707795	15	2			140.935	mayaroensis	–	BC	65.03	0.70783	2	12	2
328	-19.63	contusa	31N	BC	67.85	0.707812	6	2			140.935	mayaroensis	–	BC	65.03	0.707825	14	7	4
329	-18.63	contusa	31N	BC	67.75	0.7078	1	2			141.092	mayaroensis	–	BC	65	0.707841	0	12	2
330.5	-17.13	mayaorensis	31N	BC	67.55	0.707816	4	2			141.105	eugubina	–	BC	65	0.707789	15	12	2
331	-16.63	mayaorensis	31N	BC	67.5	0.70782	5	3			141.115	eugubina	–	BC	64.99	0.707823	14	12	2
331.5	-16.13	mayaorensis	31N	BC	67.45	0.707803	20	2			141.125	eugubina	–	BC	64.98	0.707817	13	12	2
333	-14.63	mayaorensis	31N	BC	67.25	0.70781	44	2			141.145	eugubina	–	BC	64.98	0.707802	1	12	2
336	-11.63	mayaorensis	30R	BC	66.95	0.707804	5	3			141.53	?	–	BC	64.79	0.707837	13	7	4
336	-11.63	mayaorensis	30R	BC	66.95	0.707806	12	3			141.85	?	–	BC	64.63	0.707818	23	17	2
341	-6.63	mayaorensis	30N	BC	66.3	0.707817	2	2			Monte Canero, Fonte D'Olio
346	-1.63	mayaorensis	29R	BC	65.4	0.707818	4	2			top K	mayaroensis	29R	BC	65.03	0.70785	2	17	1
346.43	-1.2	mayaorensis	29R	BC	65.25	0.7078	7	2			KTB	KTB clay	29R	FT	65	0.707864	4	12	2
346.81	-0.82	mayaorensis	29R	BC	65.15	0.707769	4	2			base T	eugubina	29R	BC	64.95	0.707865	3	12	2
347.06	-0.57	mayaorensis	29R	BC	65.1	0.707808	5	3			0.6	?	29R	BC	64.92	0.707819	11	12	2
347.27	-0.36	mayaorensis	29R	BC	65.05	0.707804	18	2			0.6	?	29R	FT	64.92	0.707848	11	12	2
347.52	-0.11	mayaorensis	29R	BC	65.02	0.707825	0	2			Pietralata
347.54	-0.09	mayaorensis	29R	BC	65.01	0.700803	24	2			12.5	tricarinata	32N	BC	72	0.707724	13	12	2
347.63	0	KTB clay	29R	BC	65	0.707794	4	2			12.5	tricarinata	32N	FT	72	0.707717	9	12	2
347.67	0.04	eugubina	29R	BC	64.96	0.707814	5	2			34.8	mayaroensis	30N	BC	66.4	0.707823	2	12	2
347.7	0.07	eugubina	29R	BC	64.94	0.707803	12	2			34.8	mayaroensis	30N	FT	66.4	0.707809	1	12	2
347.78	0.15	eugubina	29R	BC	64.93	0.707795	24	2			51.5	pseudomenardii	26N	BC	59.95	0.707799	1	12	2
347.95	0.32	eugubina	29R	BC	64.91	0.707814	0	2			51.5	pseudomenardii	26N	FT	59.95	0.707777	15	12	2
348.35	0.72	pseudobulloides	29R	BC	64.72	0.707825	7	2			Poggio San Vicino
349.6	1.97	pseudobulloides	?	FT	64.5	0.707835	16	2			147	gansseri	31R	BC	69.66	0.707775	1	12	2
349.9	2.27	pseudobulloides	?	BC	64.21	0.707821	5	2			147	gansseri	31R	Ino	69.66	0.707761	6	12	2
352	4.37	pseudobulloides	?	BC	63.5	0.707826	1	2			150	gansseri	31R	BC	69.38	0.707787	7	12	2
353.03	5.4	trinidadensis	?	BC	63.15	0.707802	11	2			150	gansseri	31R	Ino	69.38	0.707783	15	12	2
354	6.37	trinidadensis	?	BC	62.85	0.707801	3	2			150.35	gansseri	31R	BC	69.35	0.707785	5	12	2
356	8.37	trinidadensis	27R	BC	62.18	0.707799	12	2			150.35	gansseri	31R	Ino	69.35	0.707777	1	12	2
358.01	10.38	uncinata	27R	BC	61.74	0.707799	14	2			150.75	gansseri	31R	BC	69.3	0.707776	13	12	2
361	13.37	pusilla/pusilla	27N	BC	61.19	0.707803	10	2			150.75	gansseri	31R	Ino	69.3	0.707776	10	12	2
											Furio, via Flaminia
											239.6	mayaroensis	30N	BC	66.7	0.707798	5	12	2
											239.6	mayaroensis	30N	MO-En	66.7	0.707705	4	12	2
			Standards Jan 1992 - July 1993								239.6	mayaroensis	30N	MO-Bk	66.7	0.707721	14	12	2
				87Sr/86Sr	±2 SD	N=x
			En-1	0.709175	17	75
			NBS-987	0.710262	22	103							Standards Jan 1992 - July 1993
														87Sr/86Sr	±2 SD	N=x
													En-1	0.709175	17	75
Berkeley Center for Isotope Geochemistry													NBS-987	0.710262	22	103
BC=	Bulk carbonate
FT=	fish teeth
Ino=	inoceramid bivalves
MO=	mosasaur tooth
